# Supplementary material
Source: PubMed Central journal article supplement (PMC2727696)
Supplement: NIHMS4922-supplement-Suppl_Table_1.pdf [file NIHMS4922-supplement-Suppl_Table_1.pdf]

**Table 1 s. Characteristics of the studies and distribution of CHEK2\*1100delC genotype in breast cancer cases with two primary breast cancers and controls**

| Study                                                              | Characteristics of cases with two primary breast cancers                                                                                                                                                   | Characteristics of controls                                                                                                                                                                                       | 1100delC                                                                                 |
|--------------------------------------------------------------------|------------------------------------------------------------------------------------------------------------------------------------------------------------------------------------------------------------|-------------------------------------------------------------------------------------------------------------------------------------------------------------------------------------------------------------------|------------------------------------------------------------------------------------------|
| BBC.<br>Population-based, UK<br>(12)                               | Ascertained through the English & Scottish Cancer Registries. 1 <sup>st</sup> primary dx <age 65 in 1971 or later <sup>1</sup><br>Age range: 26-65<br>Ethnicity: British Caucasian<br>BRCA1/2 screened: No | i) Friends and non-blood relatives of cases<br>N=160<br>ii) Cohort of healthy women participating in an RCT of mammographic screening.<br>N=477<br>Age range: i) 24-81, ii) 46-52<br>Ethnicity: British Caucasian | Ca 11/583 (1.9%)<br>Co i) 0/160<br>ii) 4/477<br>All 4/637 (0.6%)<br>OR=3.04 (0.89-13.17) |
| ICR_FBC.<br>Ascertained through cancer genetics clinics,<br>UK (3) | Selected on FH of ≥1 affected relative with breast or ovarian cancer.<br>Age range: 18-80<br>Ethnicity: 97% British Caucasian                                                                              | Random sample from the 1958 Birth Cohort Collection. Females born in Britain between 01/01/1958 and 31/12/1958.<br>Age range: All age 48                                                                          | Ca 10/321 (3.1%)<br>Co 6/1027 (0.6%)<br>OR=5.47 (1.78-18.43)                             |

|                                                                                                                      |                                                                                                                                                                                                                                                                                                                                        |                                                                                                                                                                                                                                                                |                                                                                                              |
|----------------------------------------------------------------------------------------------------------------------|----------------------------------------------------------------------------------------------------------------------------------------------------------------------------------------------------------------------------------------------------------------------------------------------------------------------------------------|----------------------------------------------------------------------------------------------------------------------------------------------------------------------------------------------------------------------------------------------------------------|--------------------------------------------------------------------------------------------------------------|
|                                                                                                                      | BRCA1/2 screened: 281/321                                                                                                                                                                                                                                                                                                              | Ethnicity: British Caucasians                                                                                                                                                                                                                                  |                                                                                                              |
| HEBCS.<br>Hospital-based,<br>Helsinki, Finland (13)                                                                  | i) Selected on FH of i) $\geq 2$ breast or ovarian cancers in 1 <sup>st</sup> or 2 <sup>nd</sup> degree relatives N=38 ii) $\geq 1$ breast or ovarian cancer in 1 <sup>st</sup> degree relatives N=41<br>ii) Additional cases not selected on FH N=65<br>Age range: 16-87<br>Ethnicity: Finnish Caucasian<br>BRCA1/2 screened: 113/144 | Healthy population controls from the Finnish Red Cross Blood Transfusion Service.<br>Age range: 18-65<br>Ethnicity: Finnish Caucasian                                                                                                                          | Ca 10/144 (6.9%)<br>Co 26/1885 (1.4%)<br><br>OR=5.34 (2.24-11.71)                                            |
| Rotterdam.<br>Ascertained through<br>clinical genetics centre,<br>Rotterdam, Southwest<br>Netherlands.<br>(2) & (14) | i) 112 cases with $\geq 2$ cases of female breast cancer in 1 <sup>st</sup> or 2 <sup>nd</sup> degree relatives, of which 1 $\geq$ case dx < age 60<br>ii) 33 additional bilateral cases, 28/33 dx age < 60<br>Age range: 23-81<br>Ethnicity: Caucasian<br>BRCA1/2 screened: Yes                                                       | i) Spouses of individuals heterozygous for cystic fibrosis, ascertained through the clinical genetics centre Rotterdam, N=184<br>ii) Population based controls age > 55 years, N=460<br>iii) blood donors, N=265<br>Age range: N/A<br>Ethnicity: 97% Caucasian | Ca 15/144 (10.4%)<br>Co i) 3/184<br>ii) 6/460<br>iii) 0/265<br>All 9/909 (1.0%)<br><br>OR=11.62 (4.64-30.67) |
| ABCS.<br>Hospital-based,<br>Amsterdam & Leiden,                                                                      | Majority (245/247) cases dx < age 50. Bilateral cases were those who developed a second primary > 1 year after the first primary.                                                                                                                                                                                                      | Controls from Southwest Netherlands, as above <sup>3</sup>                                                                                                                                                                                                     | Ca 15/247 (6.1%)<br>Co i) 3/184<br>ii) 6/460                                                                 |

|                                                                    |                                                                                                                                                                                          |                                                                                                                                                                                                                                                   |                                                                                                            |
|--------------------------------------------------------------------|------------------------------------------------------------------------------------------------------------------------------------------------------------------------------------------|---------------------------------------------------------------------------------------------------------------------------------------------------------------------------------------------------------------------------------------------------|------------------------------------------------------------------------------------------------------------|
| Netherlands<br>(15) & (16)                                         | Age range: 22-63<br>Ethnicity: 95% Caucasian<br>BRCA1/2 screened: Yes <sup>2</sup>                                                                                                       |                                                                                                                                                                                                                                                   | iii) 0/265<br>All 9/909 (1.0%)<br><br>OR=6.47 (2.61-16.94)                                                 |
| HBBCS.<br>Hospital-based,<br>Hannover, Germany<br>(17)             | Cases received radiotherapy for breast cancer at Hannover Medical School<br>Age range: 27-83<br>Ethnicity: Caucasian<br>BRCA1/2 screened: Yes                                            | Anonymous random blood donors at Hannover Medical School<br>Age range: 18-68<br>Ethnicity: Caucasian                                                                                                                                              | Ca 0/138 (0.0%)<br>Co 1/500 (0.2%)<br><br>OR=0.0 (0.0 – 140.8)                                             |
| St Petersburg.<br>Hospital-based, St<br>Petersburg, Russia<br>(18) | Consecutive bilateral breast cancer cases dx at the NN Petrov Institute of Oncology between 1984-2004.<br>Age range: 26-85<br>Ethnicity: Caucasian<br>BRCA1/2 screened: Yes <sup>4</sup> | i) Healthy female blood donors N=356 ii) hospital controls from St Petersburg City Hospital N=92 iii) Elderly tumour free women from general hospitals in St Petersburg N=373<br>Age range: i) 18-54, ii) 55-74 iii)75-96<br>Ethnicity: Caucasian | Ca 8/145 (5.5%)<br>Co i) 1/356<br>ii) 0/92<br>iii) 0/373<br>All 1/821 (0.1%)<br><br>OR=47.88 (6.30-2126.8) |
| i) GENICA.<br>Population-based,<br>Greater Bonn,<br>Germany        | i) GENICA study (N=17) ii) a cohort of cases diagnosed at the Städtisches Klinikum Karlsruhe (SKK) (N=89).<br>Age range: 29-89                                                           | i) GENICA - population-based controls from Greater Bonn, North Rhine-Westphalia, Germany. Matched to cases by 5-year age groups and residency. N=724                                                                                              | Ca 2/106 (1.9%)<br>Co i) 6/651<br>ii) 0/600<br>All 6/1251 (0.5%)                                           |

|                                                                             |                                                  |                                                                                                                                                                                          |                      |
|-----------------------------------------------------------------------------|--------------------------------------------------|------------------------------------------------------------------------------------------------------------------------------------------------------------------------------------------|----------------------|
| (19) (20)<br><br>ii) SKK.<br>Hospital-based,<br>Karlsruhe, Germany.<br>(21) | Ethnicity: Caucasian<br><br>BRCA1/2 screened: No | ii) KORA - population-based controls from<br>health survey in Augsburg, Bavaria,<br>Germany. Matched to cases by 5-year age<br>groups. N=600<br>Age range 24-80,<br>Ethnicity: Caucasian | OR=3.99 (0.39-22.64) |
| Pooled data<br>(Bilateral)                                                  |                                                  |                                                                                                                                                                                          | 6.43 (4.33-9.56)     |

**Footnotes:** FH family history, dx diagnosed, N/A not available.

<sup>1</sup> 72/583 (12.3%) of the cases in the BBC were asynchronous ipsilateral cases whose second primary was registered as a new primary by the pathologist and the registry. The proportion of carriers of CHEK2\*1100delC in this group was 2/72 (2.8%) compared to 9/511 (1.8%) in bilateral cases from this study.

<sup>2</sup> Cases were screened for the BRCA1 & BRCA2 mutations found most frequently in the Dutch population (~70% of all BRCA mutations) (16).

<sup>3</sup> No independent controls were screened as part of the ABCS study. As both studies are based in Southwest Netherlands, the 909 controls from the Rotterdam study was used as a comparison group for the ABCS case series. The ABCS and Rotterdam data were analysed as a single study with 391 cases and 909 controls in the pooled analysis.

<sup>4</sup> Cases were screened for BRCA1 5382insC (26)
