# Supplementary material
Source: PubMed Central journal article supplement (PMC2727696)
Supplement: NIHMS4922-supplement-Suppl_Table_2.pdf [file NIHMS4922-supplement-Suppl_Table_2.pdf]

**Table 2s. Lifetime predicted risks to the unaffected 40 year old daughter of a bilateral breast cancer case according to age at diagnosis of the mother and number of additional unaffected female relatives.**

|                                                                     | BRCA mutation test negative |                  | CHEK2*1100delC carrier |                   |
|---------------------------------------------------------------------|-----------------------------|------------------|------------------------|-------------------|
|                                                                     | Age 40-50 yrs               | Lifetime (80yrs) | Age 40-50 yrs          | Lifetime (80 yrs) |
| <b>Status unknown for maternal aunt1, aunt2, aunt3, grandmother</b> |                             |                  |                        |                   |
| Age at diagnosis for bilaterally affected mother                    |                             |                  |                        |                   |
| 50 & 50                                                             | 3.90%                       | 17.90%           | 8.80%                  | 36.90%            |
| 55 & 55                                                             | 3.60%                       | 17.00%           | 8.20%                  | 35.40%            |
| 60 & 60                                                             | 3.30%                       | 16.20%           | 7.60%                  | 33.80%            |
| 65 & 65                                                             | 3.10%                       | 15.30%           | 7.00%                  | 32.10%            |
| 70 & 70                                                             | 2.80%                       | 14.30%           | 6.40%                  | 30.30%            |
| <b>Age at diagnosis for bilaterally affected mother 50 &amp; 50</b> |                             |                  |                        |                   |
| Status of mothers first degree female relatives                     |                             |                  |                        |                   |
| Status unknown for maternal aunt1, aunt2, aunt3, grandmother        | 3.90%                       | 17.90%           | 8.80%                  | 36.90%            |
| 1 maternal aunt known unaffected age 62                             | 3.80%                       | 17.60%           | 8.60%                  | 36.40%            |
| 2 maternal aunts known unaffected age 62 & 64                       | 3.70%                       | 17.40%           | 8.40%                  | 36.00%            |
| 3 maternal aunts known unaffected age 62, 64, 66                    | 3.60%                       | 17.20%           | 8.30%                  | 35.70%            |
| 3 maternal aunts & grandmother known unaffected age 62, 64, 66, 80  | 3.60%                       | 17.00%           | 8.20%                  | 35.30%            |
|                                                                     |                             |                  |                        |                   |
|                                                                     |                             |                  |                        |                   |
|                                                                     |                             |                  |                        |                   |
|                                                                     |                             |                  |                        |                   |
